# Supplementary material for: Patient and Provider Dilemmas of type 2 Diabetes Self-Management: a Qualitative Study in Socioeconomically Disadvantaged Communities in Stockholm
Source: Preprints.org preprint supplement (doi:10.20944/preprints201807.0338.v1), 2018-07-19
Supplement: Supplementary file 2 [file supplementary]

Archive with 1 entries (1 files):
- Appendix 1- Supplimentary material.pdf
